# Supplementary material for: Copeptin as a marker of outcome after cardiac arrest: a sub-study of the TTM trial
Source: Springer Nature journal article supplement (doi:10.1186/s13054-020-02904-8), 2020-04-28

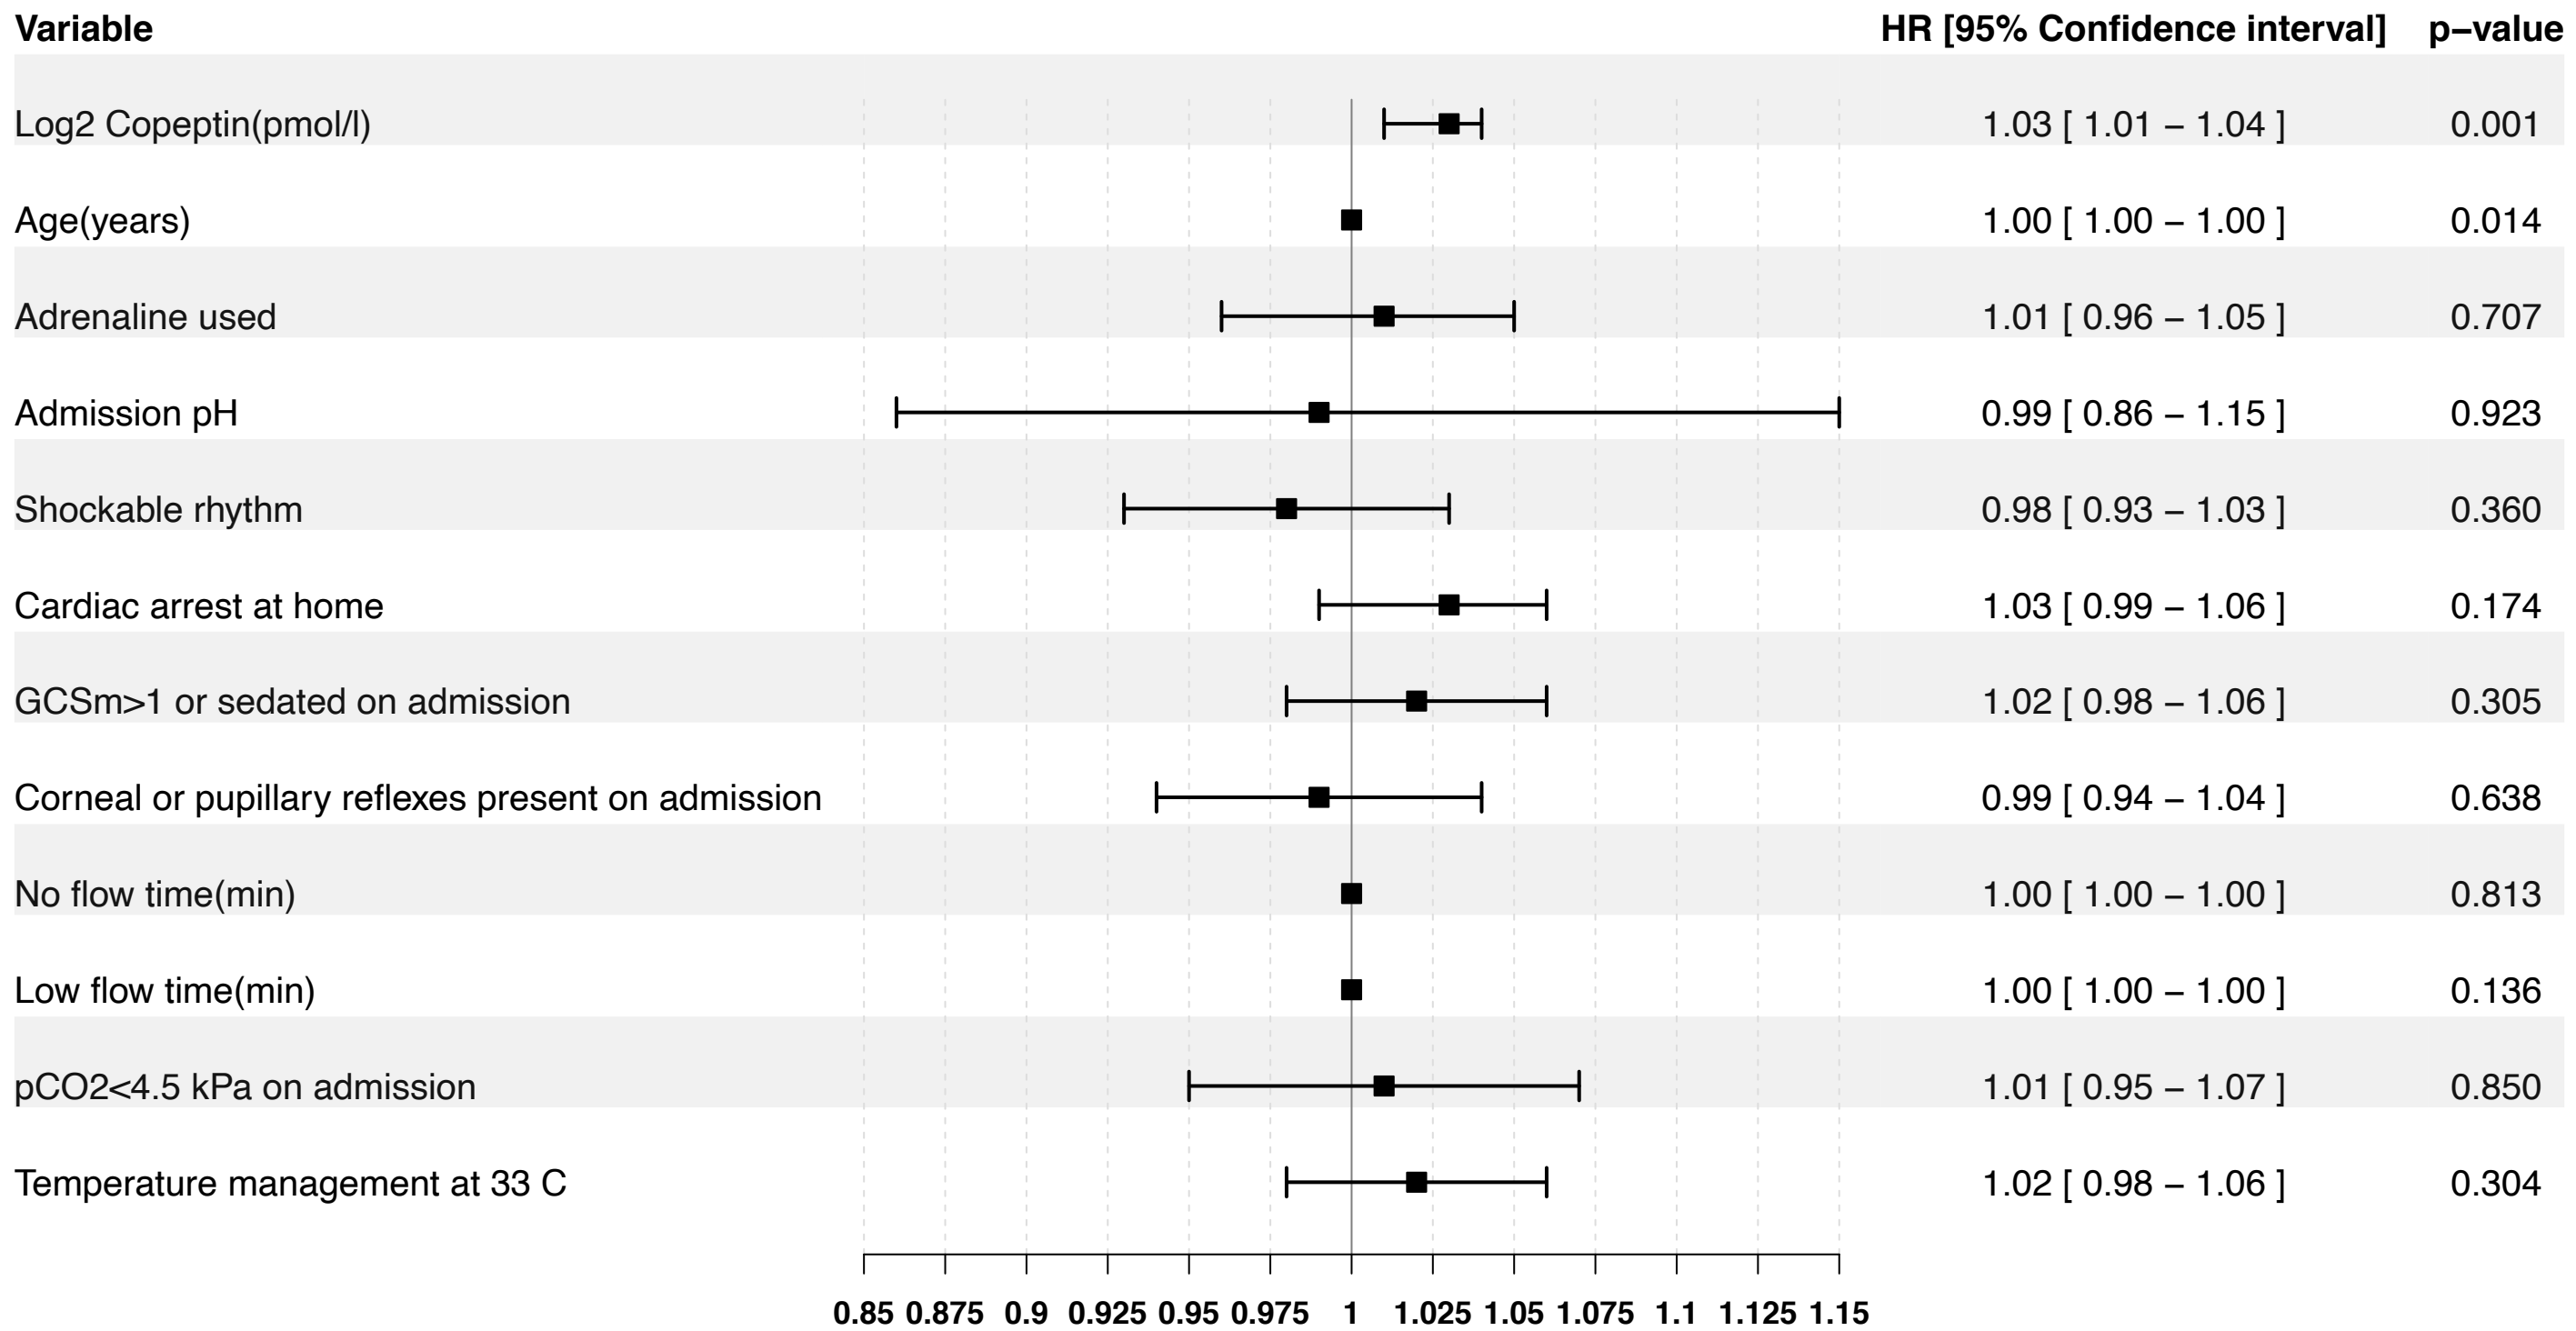

Supplement: MOESM4 [file 17937360]
